# Supplementary material
Source: MDPI journal article supplement (https://www.mdpi.com/1660-4601/12/6/6232)
Supplement: s1 [file s1]

# Disparities in Children’s Blood Lead and Mercury Levels According to Community and Individual Socioeconomic Positions

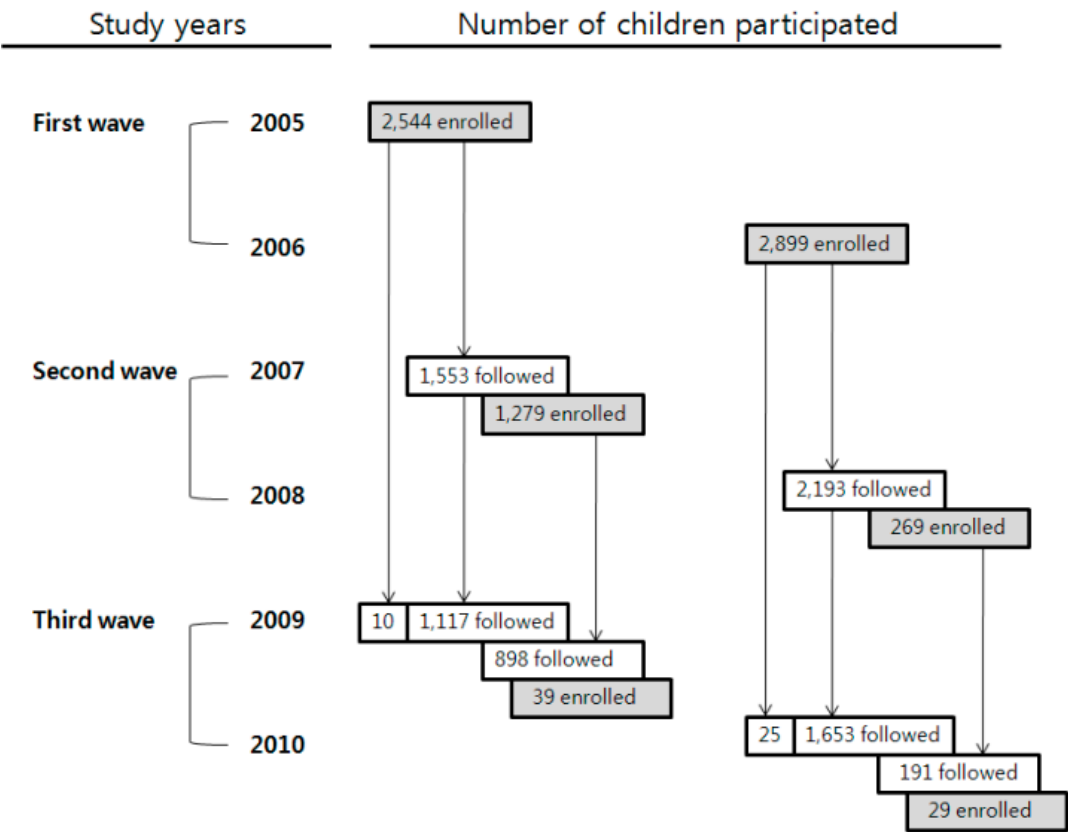

**Figure S1.** Number of participating primary school children by study years in the CHEER, Korea, 2005–2010.

The number of total enrolled children was 7059. Among them, blood lead and mercury level were measured in 6094 children. During the study period in the three waves, 2770 children were followed 2 times completely. Of 2770, 2285 children have both information of an individual SEP indicator and blood metal level. Finally, 2281 children were selected as a study population after excluding two children who were over eight years old and blood lead or mercury level was outlier.

**Table S1.** Comparison of children examined at all three waves and the lost to follow-up among children who were 1st or 2nd grades students in elementary schools at baseline and enrolled at 2005 and 2006.

|                                                         | Children Followed-up Completely |      | Lost to Follow-up |      | <i>p</i> Value |
|---------------------------------------------------------|---------------------------------|------|-------------------|------|----------------|
|                                                         | No.                             | %    | No.               | %    |                |
| All No.                                                 | 2311                            | 100  | 1872              | 100  |                |
| Age (years)                                             |                                 |      |                   |      |                |
| 5                                                       | 0                               |      | 3                 | 0.2  |                |
| 6                                                       | 463                             | 20.0 | 390               | 20.8 |                |
| 7                                                       | 1464                            | 63.4 | 1153              | 61.6 |                |
| 8                                                       | 384                             | 16.6 | 326               | 17.4 |                |
| Mean $\pm$ SD                                           | 6.97 $\pm$ 0.60                 |      | 6.96 $\pm$ 0.62   |      | 0.8663         |
| Gender                                                  |                                 |      |                   |      |                |
| Male                                                    | 1157                            | 50.1 | 1010              | 54.0 |                |
| Female                                                  | 1154                            | 49.9 | 862               | 46.0 | 0.0123         |
| Residential area                                        |                                 |      |                   |      |                |
| Urban                                                   | 765                             | 33.1 | 480               | 25.6 |                |
| Industrial                                              | 880                             | 38.1 | 855               | 45.7 |                |
| Rural                                                   | 666                             | 28.8 | 537               | 28.7 | <0.0001        |
| Household monthly income                                |                                 |      |                   |      |                |
| Lowest                                                  | 778                             | 34.1 | 562               | 31.8 |                |
| Middle                                                  | 825                             | 36.1 | 599               | 33.9 |                |
| Highest                                                 | 680                             | 29.8 | 606               | 34.3 | 0.0093         |
| Baseline blood lead ( $\mu\text{g/dL}$ ) GM $\pm$ GSD   | 1.65 $\pm$ 1.76                 |      | 1.65 $\pm$ 1.76   |      | 0.8430         |
| Baseline blood mercury ( $\mu\text{g/L}$ ) GM $\pm$ GSD | 2.06 $\pm$ 2.04                 |      | 2.03 $\pm$ 2.09   |      | 0.4839         |

**Table S2.** Relations between frequency of fish intake, blood mercury level, and individual and community SEP in 2281 children, CHEER, Korea, 2005–2006.

| Mercury Level ( $\mu\text{g/L}$ ), GM |        | Fish Intake * |            | (%) of Children, Frequent Fish Intake |
|---------------------------------------|--------|---------------|------------|---------------------------------------|
|                                       |        | Rarely        | Frequently |                                       |
| Less deprived community               |        | (5.70)        | (6.40)     | (5.8)                                 |
|                                       | low    | 1.94          | 2.00       | (4.2)                                 |
| Household income                      | middle | 1.93          | 2.12       | (5.3)                                 |
|                                       | high   | 1.83          | 2.28       | (7.9)                                 |
| More deprived community               |        | (6.12)        | (7.03)     | (6.6)                                 |
|                                       | low    | 2.07          | 2.39       | (6.0)                                 |
| Household income                      | middle | 2.05          | 2.22       | (7.0)                                 |
|                                       | high   | 2.00          | 2.42       | (6.7)                                 |

\* Fish intake: rarely &lt; once a week, frequently 4 or more times a week.

**Table S3.** Generalized linear regression analyses in association between individual and community level of SEP and blood lead and mercury levels in 2281 children, CHEER, Korea, 2005–2006.

| □                                               | Adjusted by DI |            |                 |                   | Stratified by DI |            |                 |                   |               |            |                 |                   | <i>p</i> -Interaction ‡ |
|-------------------------------------------------|----------------|------------|-----------------|-------------------|------------------|------------|-----------------|-------------------|---------------|------------|-----------------|-------------------|-------------------------|
|                                                 |                |            |                 |                   | Less Deprived    |            |                 |                   | More Deprived |            |                 |                   |                         |
|                                                 | N              | % Increase | <i>p</i> -Value | <i>p</i> -Trend † | N                | % Increase | <i>p</i> -Value | <i>p</i> -Trend † | N             | % Increase | <i>p</i> -Value | <i>p</i> -Trend † |                         |
| Household income (×10 <sup>3</sup> KRW/month) § |                |            |                 |                   |                  |            |                 |                   |               |            |                 |                   |                         |
| <2000                                           | 777            | −3.90      | 0.6343          | 0.6782            | 412              | 7.43       | 0.1187          | 0.1271            | 362           | 10.45      | 0.0128          | 0.0083            | 0.4684                  |
| 2000–2999                                       | 824            | −6.41      | 0.1804          |                   | 514              | −1.40      | 0.7374          |                   | 310           | 1.47       | 0.7141          |                   |                         |
| ≥3000                                           | 680            | reference  |                 |                   | 463              | reference  |                 |                   | 217           | reference  |                 |                   |                         |
| Educational attainment of father (years)        |                |            |                 |                   |                  |            |                 |                   |               |            |                 |                   |                         |
| <12                                             | 104            | 24.76      | 0.0004          | 0.0358            | 59               | 16.35      | 0.1048          | 0.7443            | 45            | 31.62      | 0.0003          | 0.0084            | 0.5174                  |
| 12                                              | 973            | 0.72       | 0.7903          |                   | 598              | −2.83      | 0.4625          |                   | 375           | 3.32       | 0.3427          |                   |                         |
| >12                                             | 1068           | reference  |                 |                   | 649              | reference  |                 |                   | 419           | reference  |                 |                   |                         |
| Household income (×10 <sup>3</sup> KRW/month)   |                |            |                 |                   |                  |            |                 |                   |               |            |                 |                   |                         |
| <2000                                           | 777            | 4.85       | 0.6490          | 0.6508            | 412              | −1.14      | 0.8305          | 0.8395            | 362           | 0.80       | 0.9431          | 0.4198            | 0.2609                  |
| 2000–2999                                       | 824            | 2.66       | 0.6695          |                   | 514              | 0.97       | 0.8430          |                   | 310           | −2.64      | 0.5795          |                   |                         |
| ≥3000                                           | 680            | reference  |                 |                   | 463              | reference  |                 |                   | 217           | reference  |                 |                   |                         |
| Educational attainment of father (years)        |                |            |                 |                   |                  |            |                 |                   |               |            |                 |                   |                         |
| <12                                             | 104            | −14.28     | 0.2220          | 0.1754            | 59               | −12.62     | 0.2016          | 0.0931            | 45            | 7.43       | 0.1187          | 0.7263            | 0.8247                  |
| 12                                              | 973            | −7.37      | 0.1944          |                   | 598              | −5.72      | 0.1752          |                   | 375           | −1.40      | 0.7374          |                   |                         |
| >12                                             | 1068           | reference  |                 |                   | 649              | reference  |                 |                   | 419           | reference  |                 |                   |                         |

Parameter estimated for the log transformed heavy metal using multivariate generalized linear regression model adjusted for age, gender, child's weight, residential area, second hand smoke, survey year, hour for playing outside (for blood lead), frequency of fish consumption per week (for blood mercury), and deprivation index (DI) of the community (in adjusted model); DI of the community was calculated from household overcrowding, male unemployment rate, head of family in low socioeconomic position, house ownership, and substandard living resources based on data from the 2005 Census. Less deprived;  $DI \leq 1.00$ , more deprived;  $DI > 1.00$ ; † Calculated using the ordinal scale of each individual socioeconomic position variable in the corresponding model; ‡ 1 USD equals 1132 KRW as of 04 January 2010. Numbers do not always have the same total because of the missing value. CHEER, Children's Health and Environmental Research; OR, odds ratio; CI, confidence interval.
